# Supplementary material for: Arylaminopropanone Derivatives as Potential Cholinesterase Inhibitors: Synthesis, Docking Study and Biological Evaluation
Source: PubMed Central journal article supplement (PMC7180927; doi:10.3390/molecules25071751), 2020-04-10
Supplement: molecules-25-01751-s001.pdf [file molecules-25-01751-s001.pdf]

# SUPPLEMENTARY MATERIALS

## Arylaminoopropanone derivatives as potential cholinesterase inhibitors: Synthesis, docking study and biological evaluation

Anna Hudcová, Aleš Kroutil, Renata Kubínová, Adriana D. Garro, Lucas J. Gutierrez, Ricardo D. Enriz, Michal Oravec and Jozef Csöllei

- Fig. S 1: Histogram of compound **2**
- Fig. S 2: Molecular graph of compound **2**
- Fig. S 3: The distances [ $\text{\AA}$ ] for the center of mass of molecules **3** and **6** with respect to galantamine.
- Fig. S 4:  $^1\text{H}$  NMR spectrum of compound **1**
- Fig. S 5:  $^{13}\text{C}$  NMR spectrum of compound **1**
- Fig. S 6:  $^1\text{H}$  NMR spectrum of compound **2**
- Fig. S 7:  $^{13}\text{C}$  NMR spectrum of compound **2**
- Fig. S 8:  $^1\text{H}$  NMR spectrum of compound **3**
- Fig. S 9:  $^{13}\text{C}$  NMR spectrum of compound **3**
- Fig. S 10:  $^1\text{H}$  NMR spectrum of compound **4**
- Fig. S 11:  $^1\text{H}$  NMR spectrum of compound **5**
- Fig. S 12:  $^1\text{H}$  NMR spectrum of compound **6**
- Fig. S 13:  $^1\text{H}$  NMR spectrum of compound **7**
- Fig. S 14:  $^1\text{H}$  NMR spectrum of compound **8**
- Fig. S 15:  $^1\text{H}$  NMR spectrum of compound **9**
- Fig. S 16:  $^1\text{H}$  NMR spectrum of compound **10**
- Fig. S 17:  $^1\text{H}$  NMR spectrum of compound **11**
- Fig. S 18:  $^1\text{H}$  NMR spectrum of compound **12**
- Fig. S 19:  $^1\text{H}$  NMR spectrum of compound **13**
- Fig. S 20:  $^1\text{H}$  NMR spectrum of compound **14**
- Fig. S 21:  $^1\text{H}$  NMR spectrum of compound **15**
- Fig. S 22:  $^1\text{H}$  NMR spectrum of compound **16**
- Fig. S 23: Graph of  $\text{IC}_{50}$  determination for compound **1**, inhibition of AChE.
- Fig. S 24: Graph of  $\text{IC}_{50}$  determination for compound **2**, inhibition of AChE.
- Fig. S 25: Graph of  $\text{IC}_{50}$  determination for compound **3**, inhibition of AChE.
- Fig. S 26: Graph of  $\text{IC}_{50}$  determination for compound **11**, inhibition of BuChE.
- Fig. S 27: Graph of  $\text{IC}_{50}$  determination for compound **12**, inhibition of BuChE.
- Fig. S 28: Graph of  $\text{IC}_{50}$  determination for compound **16**, inhibition of AChE.
- Fig. S 29: Graph of  $\text{IC}_{50}$  determination for **galantamine**, inhibition of AChE.
- Fig. S 30: Graph of  $\text{IC}_{50}$  determination for **galantamine**, inhibition of BuChE.

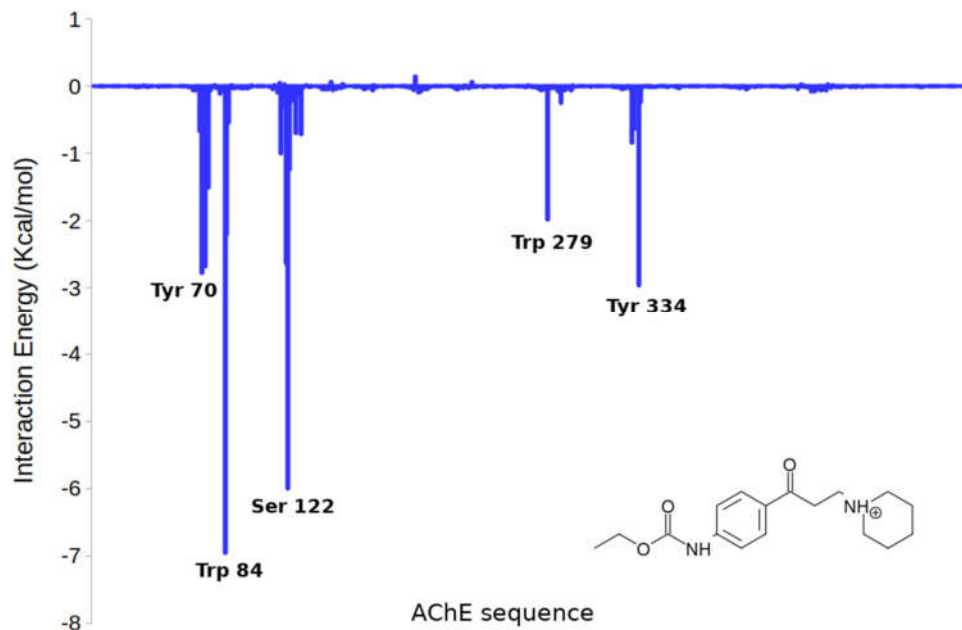

Fig. S 1: Histogram of interaction energies partitioned with respect to the AChE amino acids in complex with compound 2. The x-axis denotes the residue number of AChE, and the y-axis denotes the interaction energy between the compounds and specific residue. The negative values and positive values are favorable or unfavorable to binding, respectively.

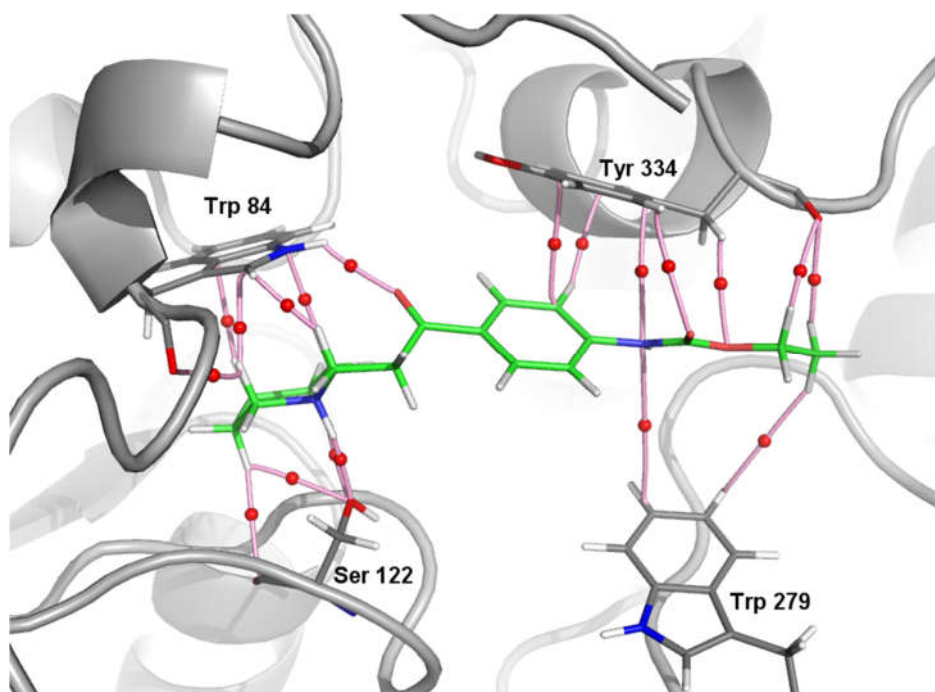

Fig. S 2: Molecular graph of the non-covalent interactions between the main residues of AChE with compound 2 (green sticks). The elements of the electron density topology are shown. The bond paths connecting the nuclei are represented in pink sticks and the bond critical points are shown as red spheres.

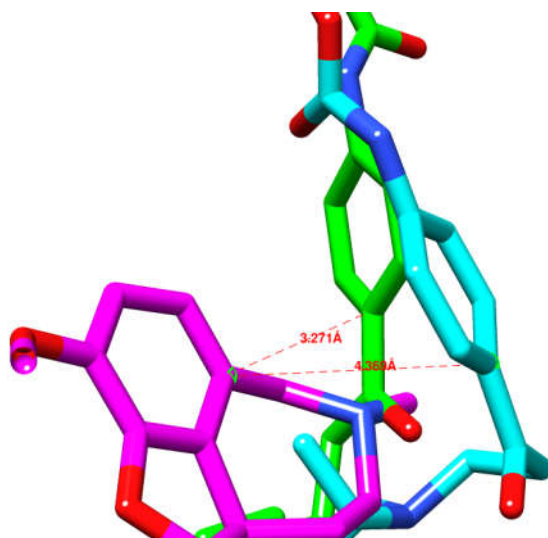

*Fig. S 3: The distances [ $\text{\AA}$ ] for the center of mass of molecules **3** and **6** with respect to galantamine. The detail of the spatial view of the compounds bonded in the binding pocket of AChE (PDB code: 1DX6). Compounds **3** (green) and **6** (light blue) are superimposed on galantamine (magenta). The poses of compounds shown in Figure S3 were obtained from the MD simulations.*

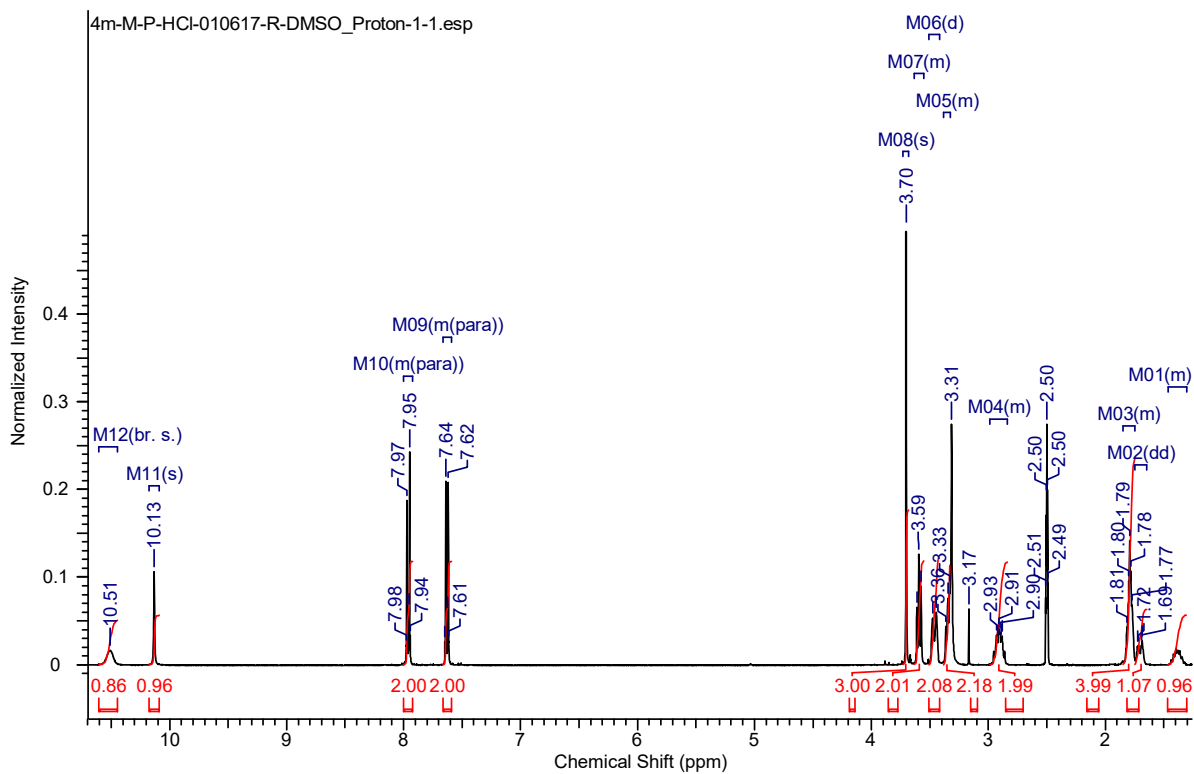

Fig. S 4:  $^1\text{H}$  NMR spectrum of compound 1

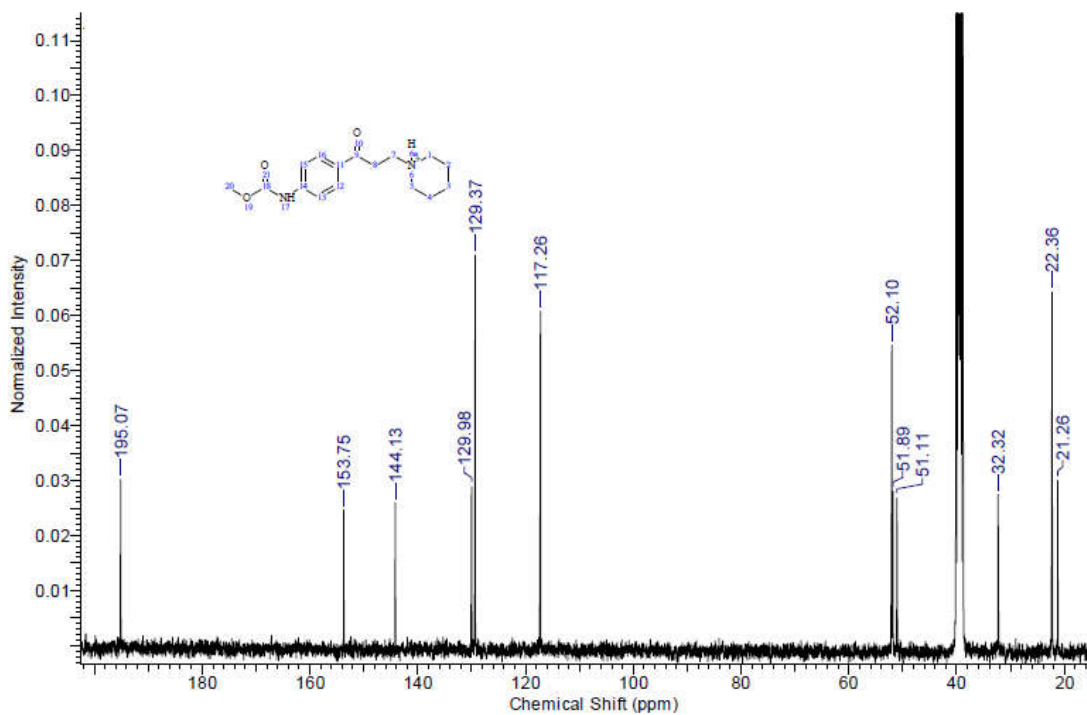

Fig. S 5:  $^{13}\text{C}$  NMR spectrum of compound 1

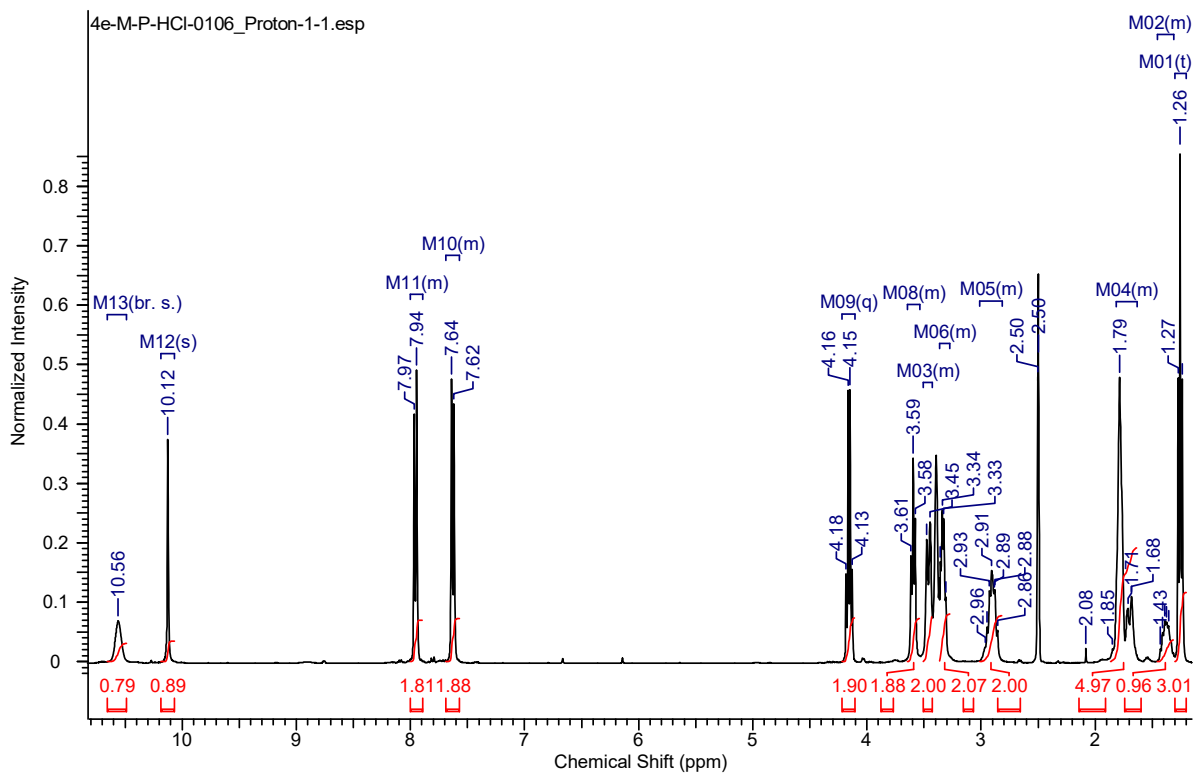

Fig. S 6:  $^1\text{H}$  NMR spectrum of compound 2

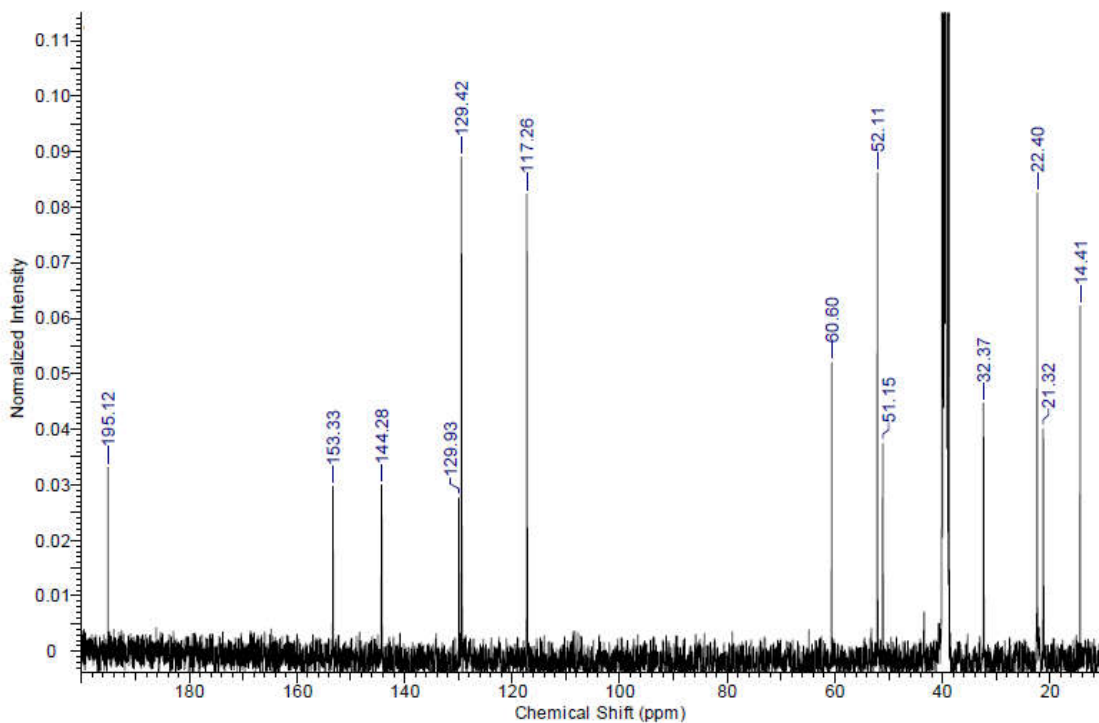

Fig. S 7:  $^{13}\text{C}$  NMR spectrum of compound 2

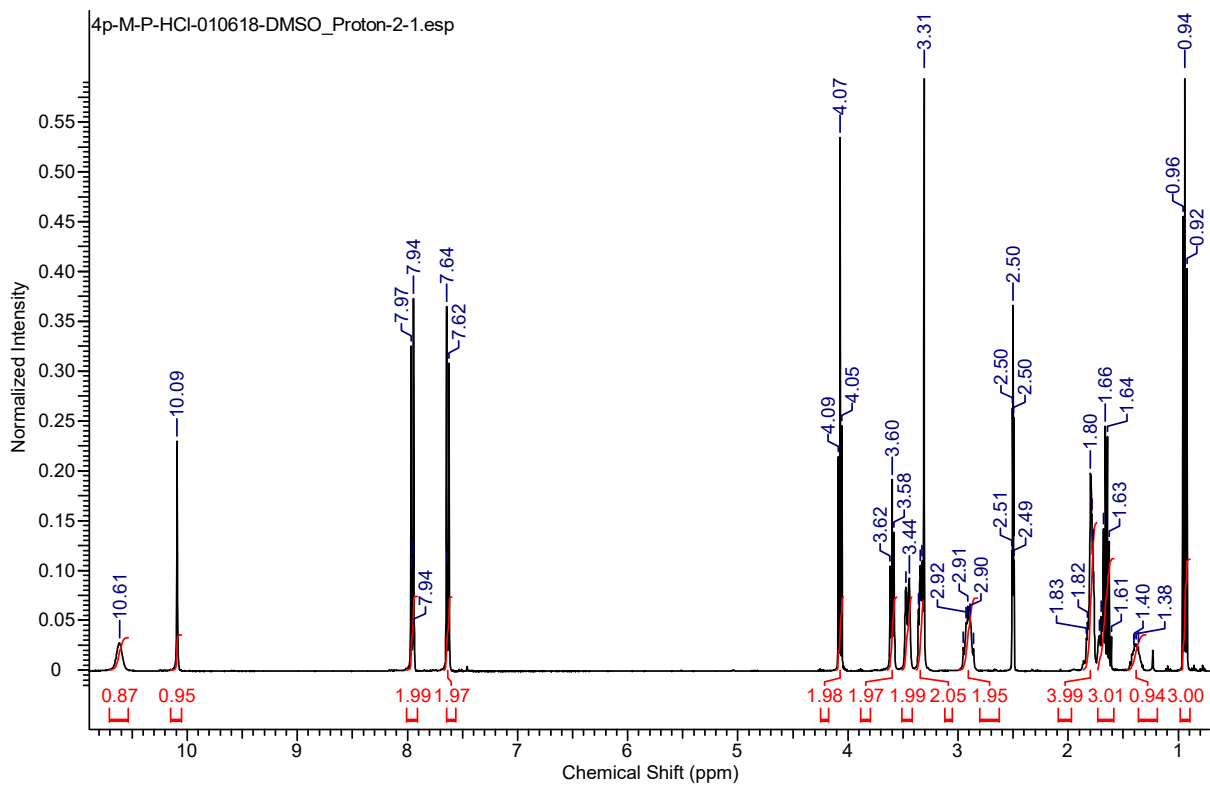

Fig. S 8:  $^1\text{H}$  NMR spectrum of compound 3

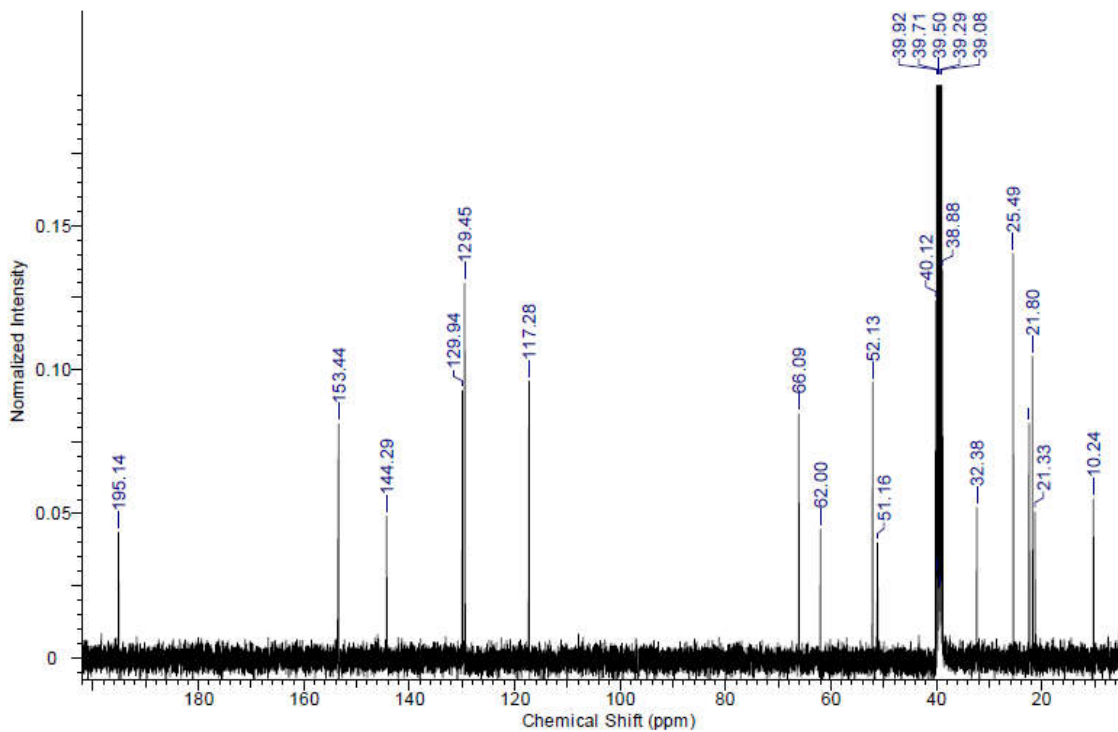

Fig. S 9:  $^{13}\text{C}$  NMR spectrum of compound 3

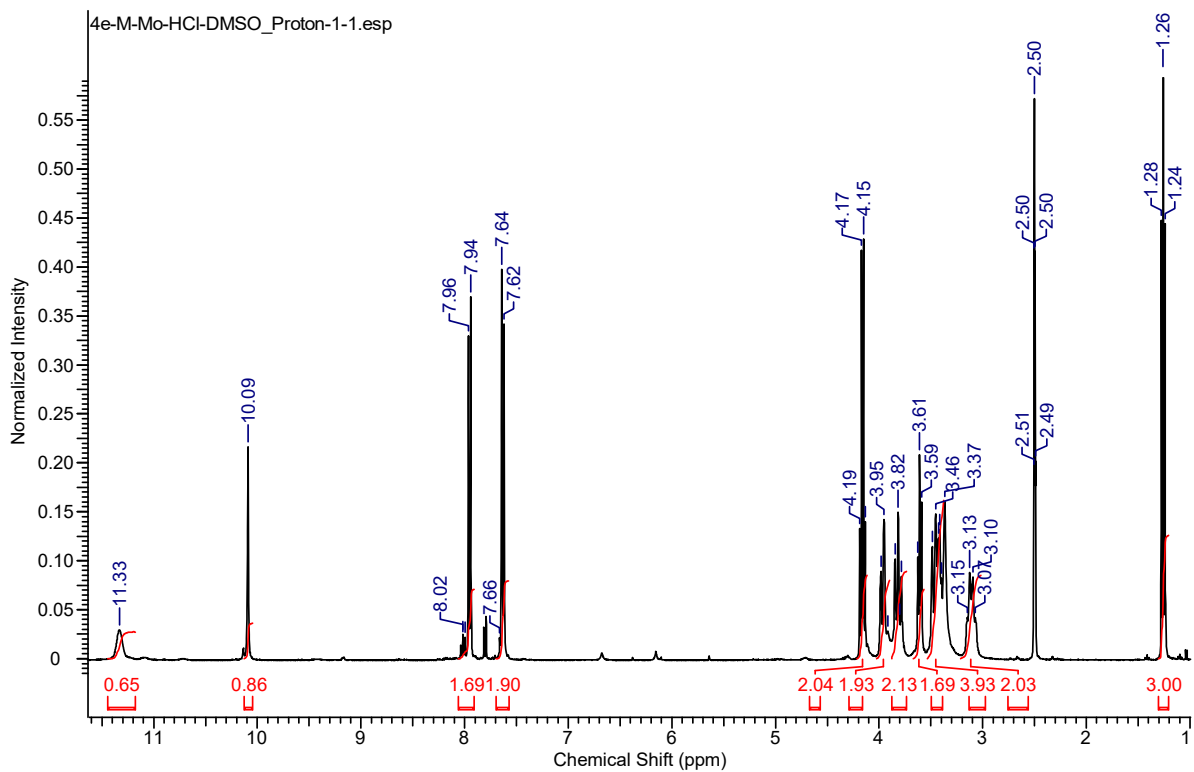

Fig. S 10:  $^1\text{H}$  NMR spectrum of compound 4

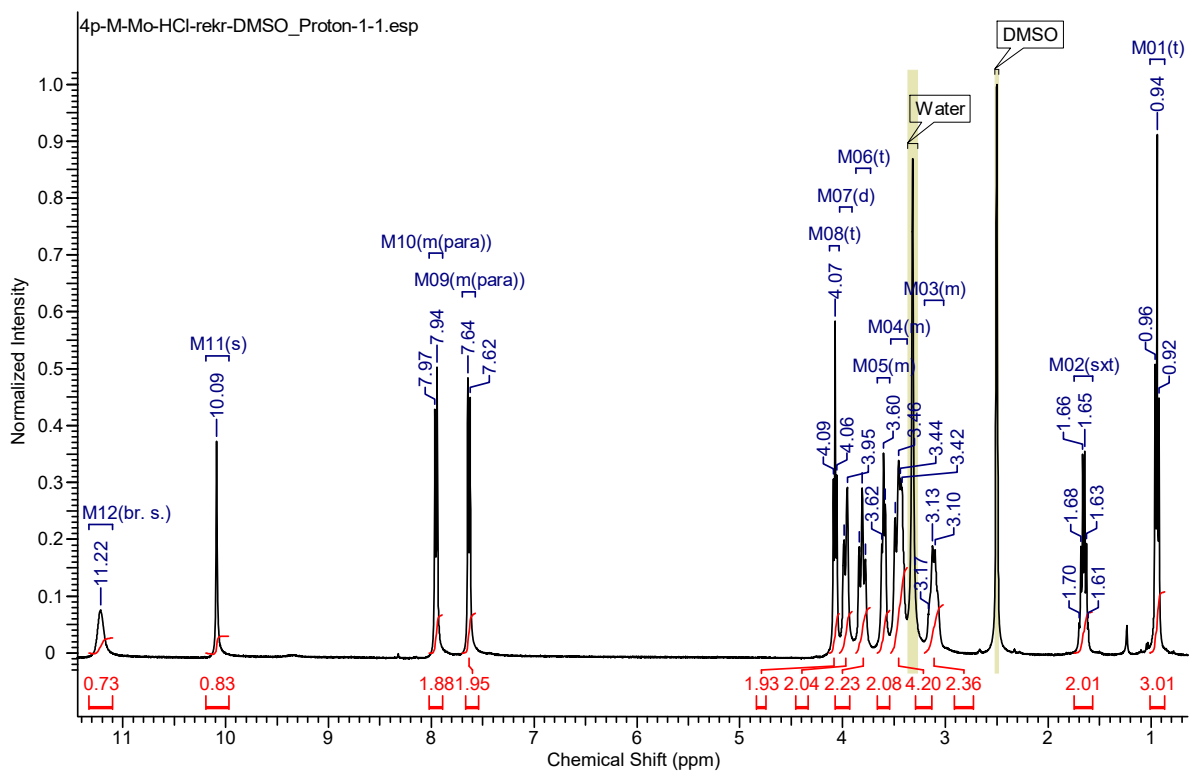

Fig. S 11:  $^1\text{H}$  NMR spectrum of compound 5

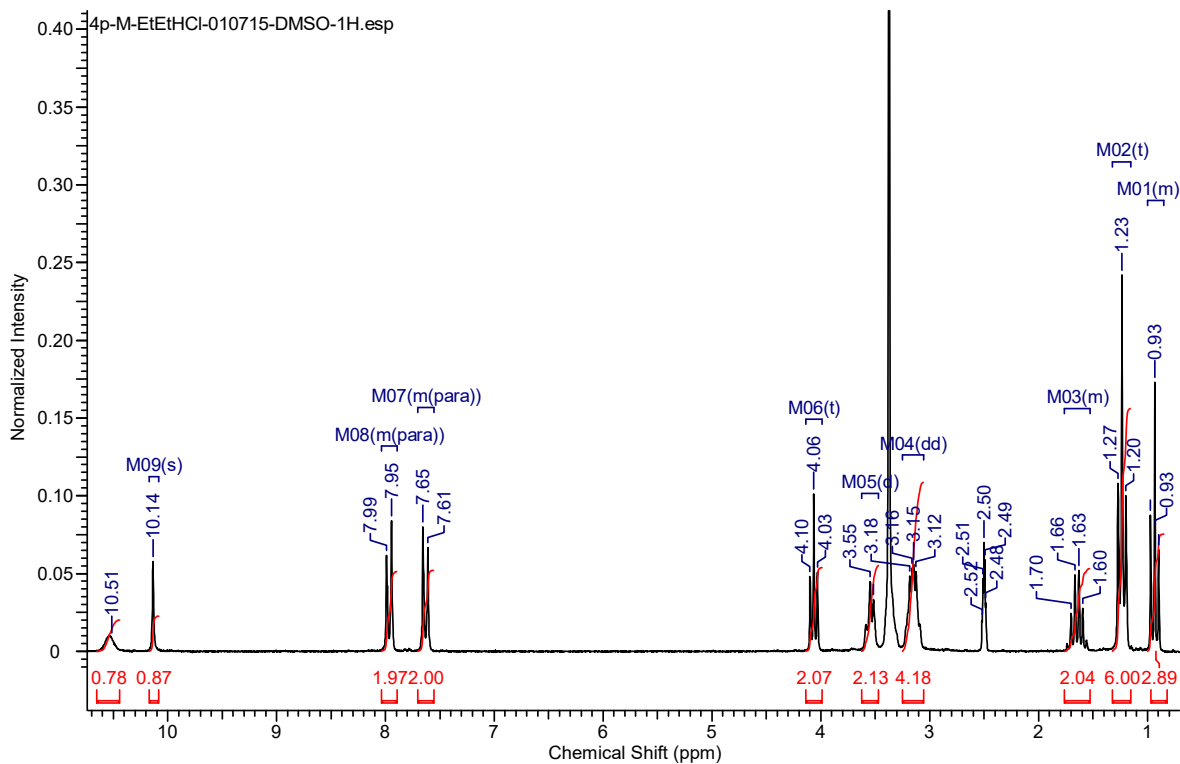

Fig. S 12:  $^1\text{H}$  NMR spectrum of compound 6

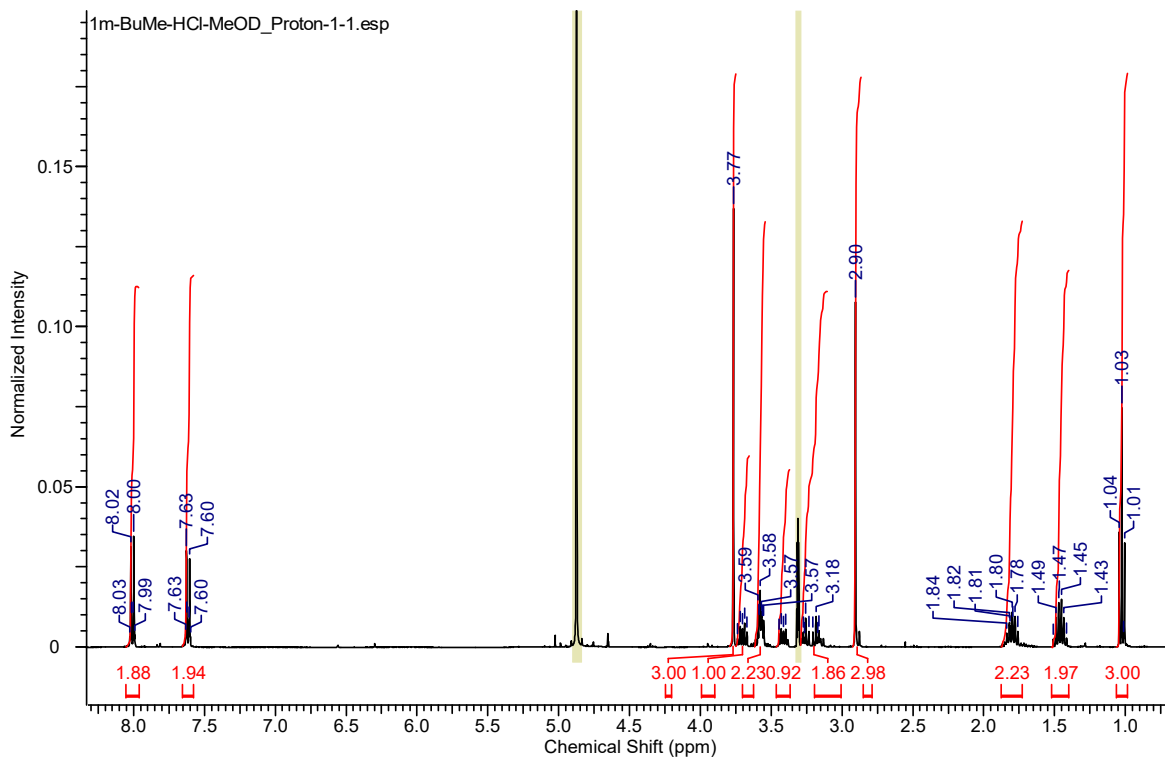

Fig. S 13:  $^1\text{H}$  NMR spectrum of compound 7



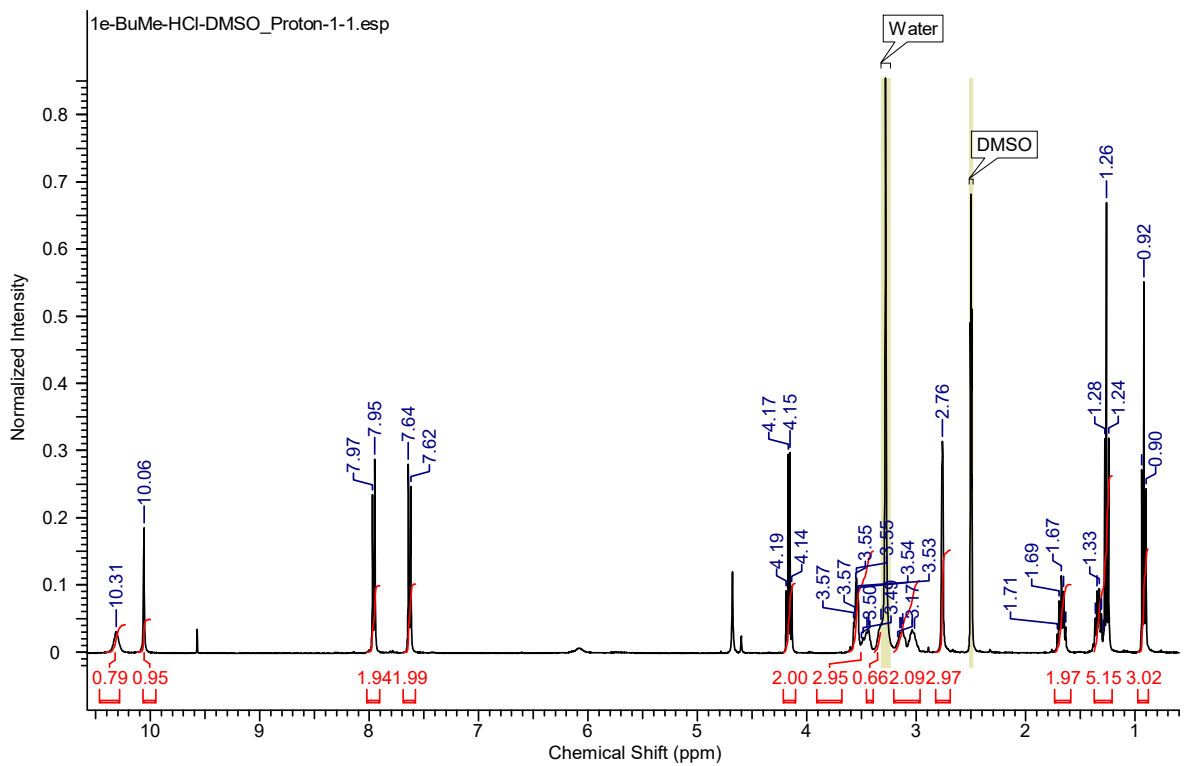

Fig. S 14:  $^1\text{H}$  NMR spectrum of compound **8**

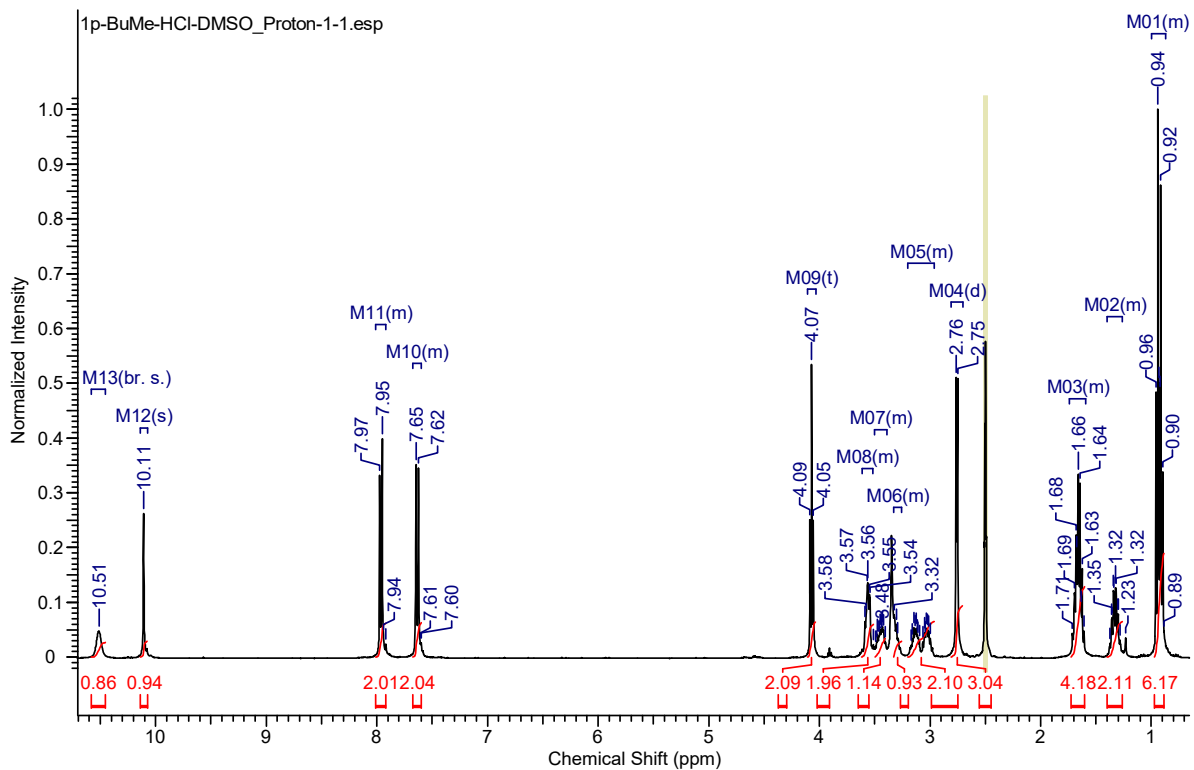

Fig. S 15:  $^1\text{H}$  NMR spectrum of compound **9**

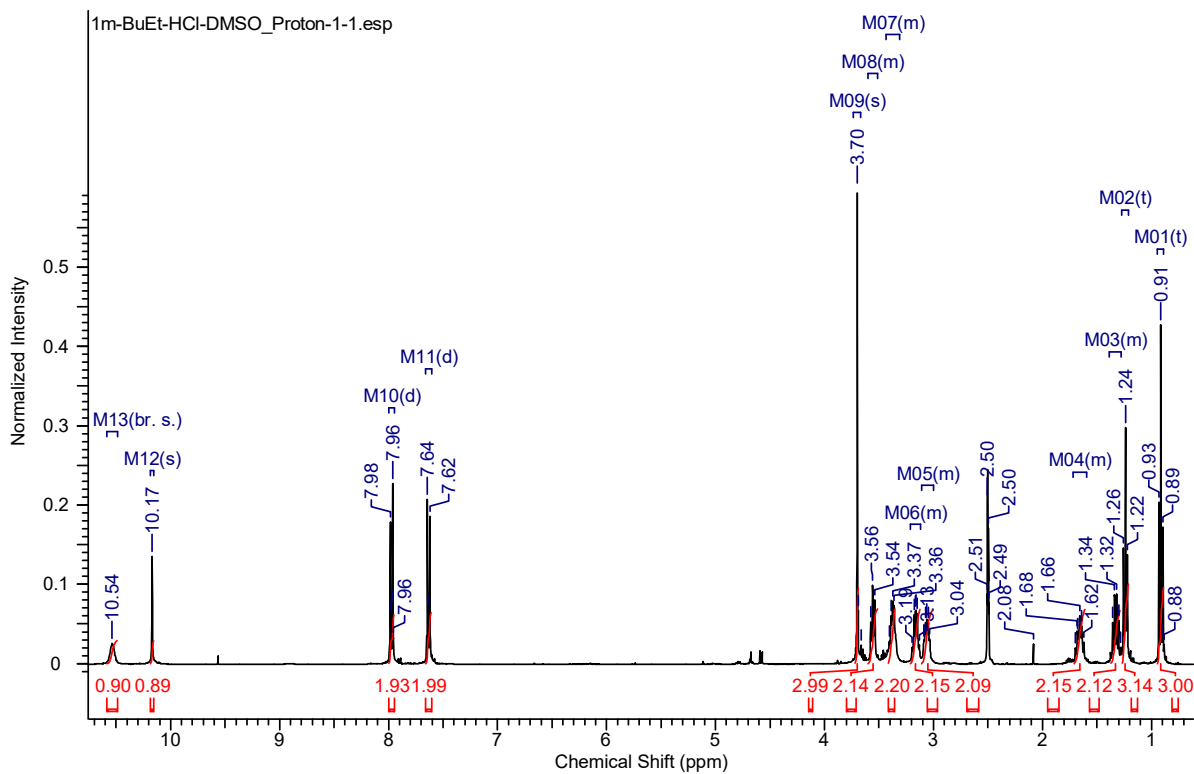

Fig. S 16:  $^1\text{H}$  NMR spectrum of compound 10

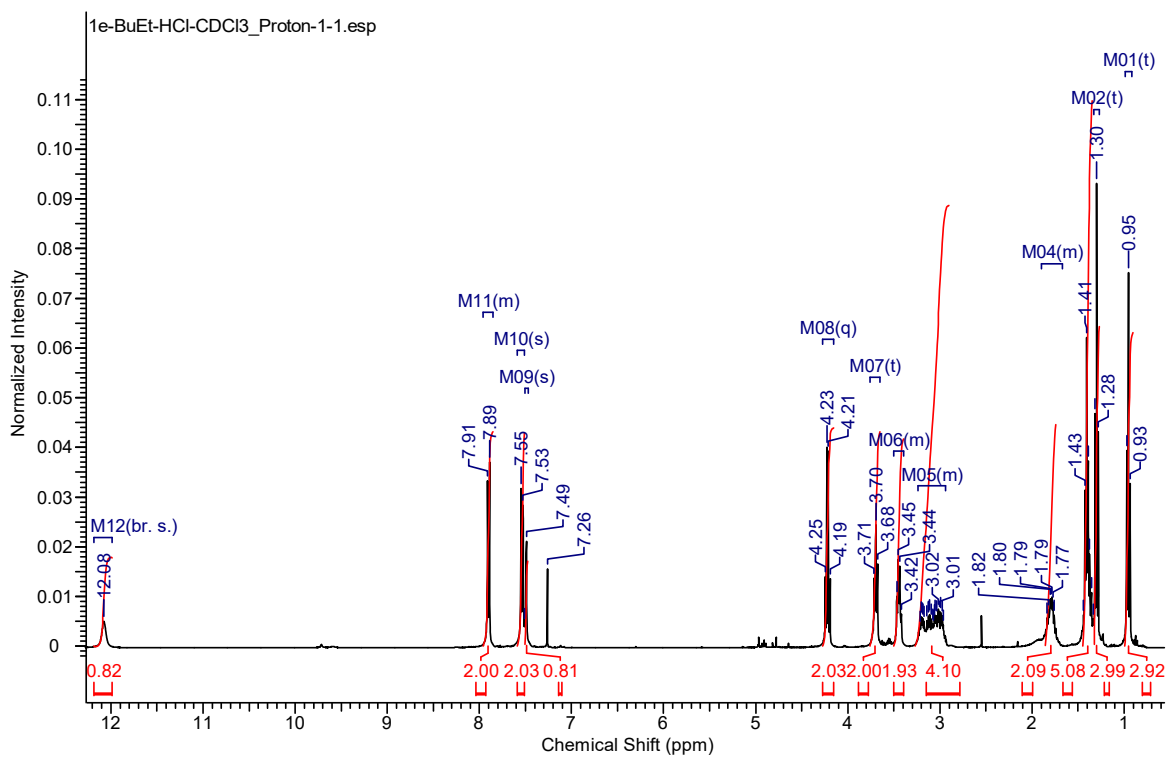

Fig. S 17:  $^1\text{H}$  NMR spectrum of compound 11

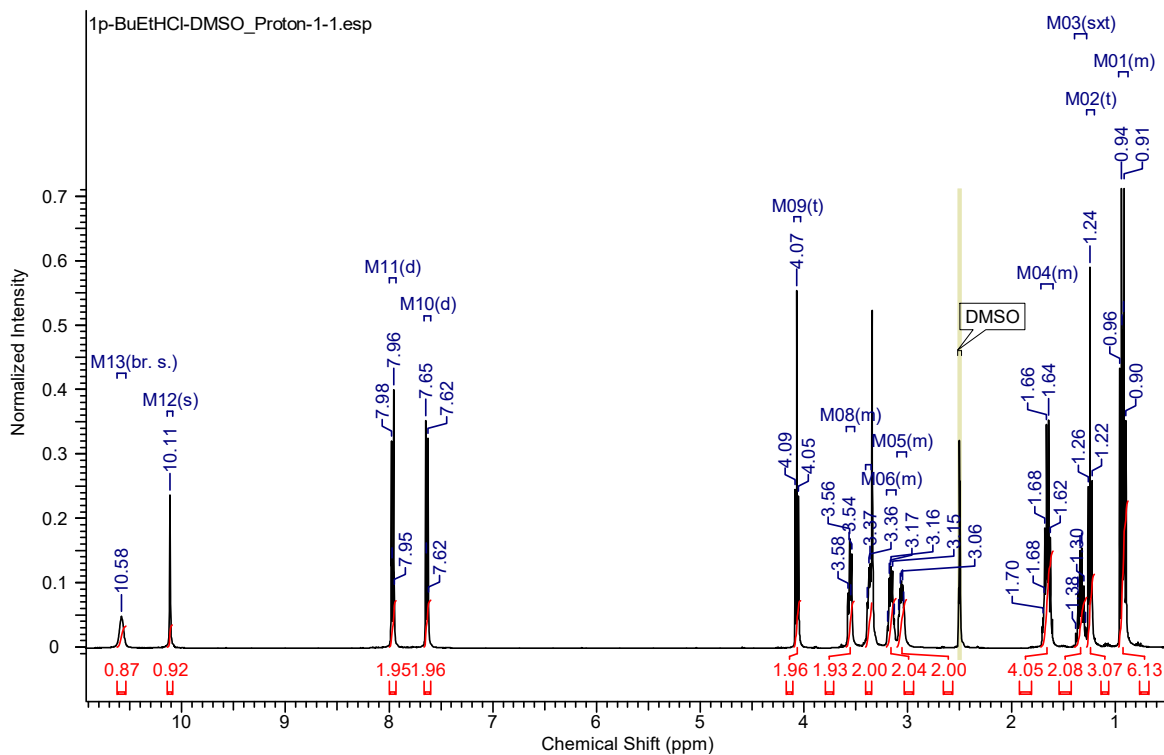

Fig. S 18:  $^1\text{H}$  NMR spectrum of compound 12

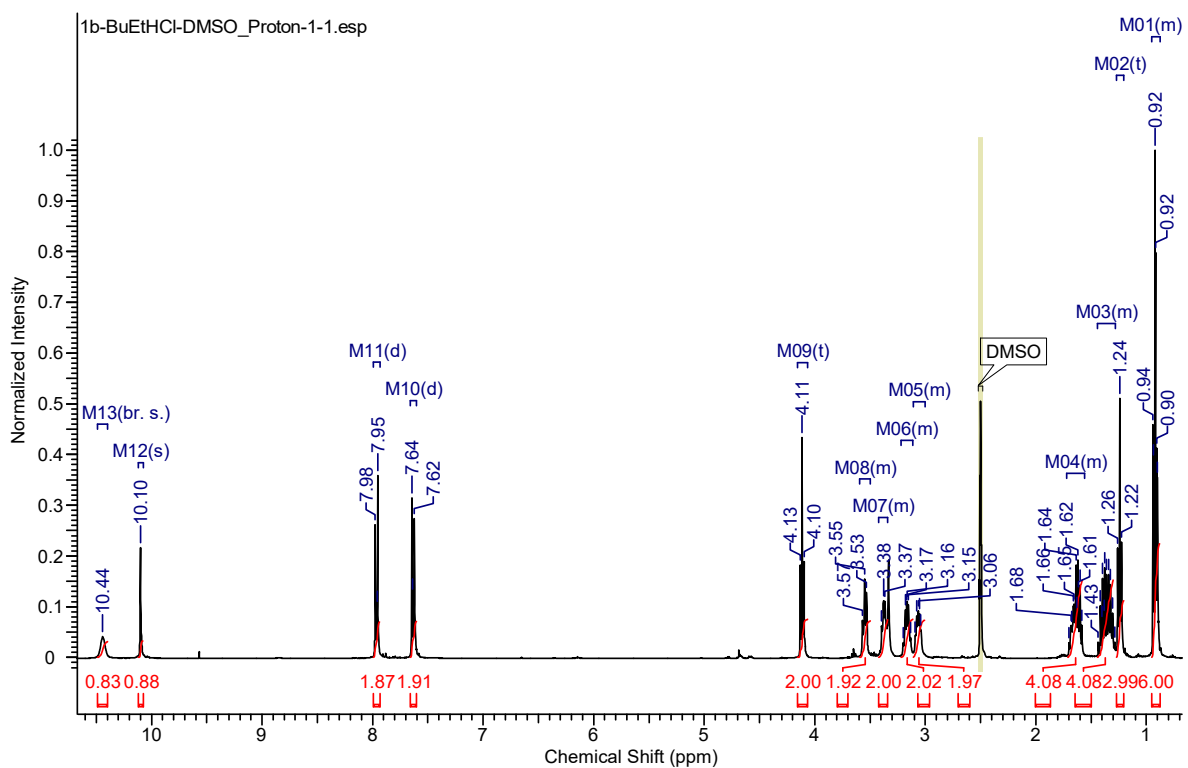

Fig. S 19:  $^1\text{H}$  NMR spectrum of compound 13

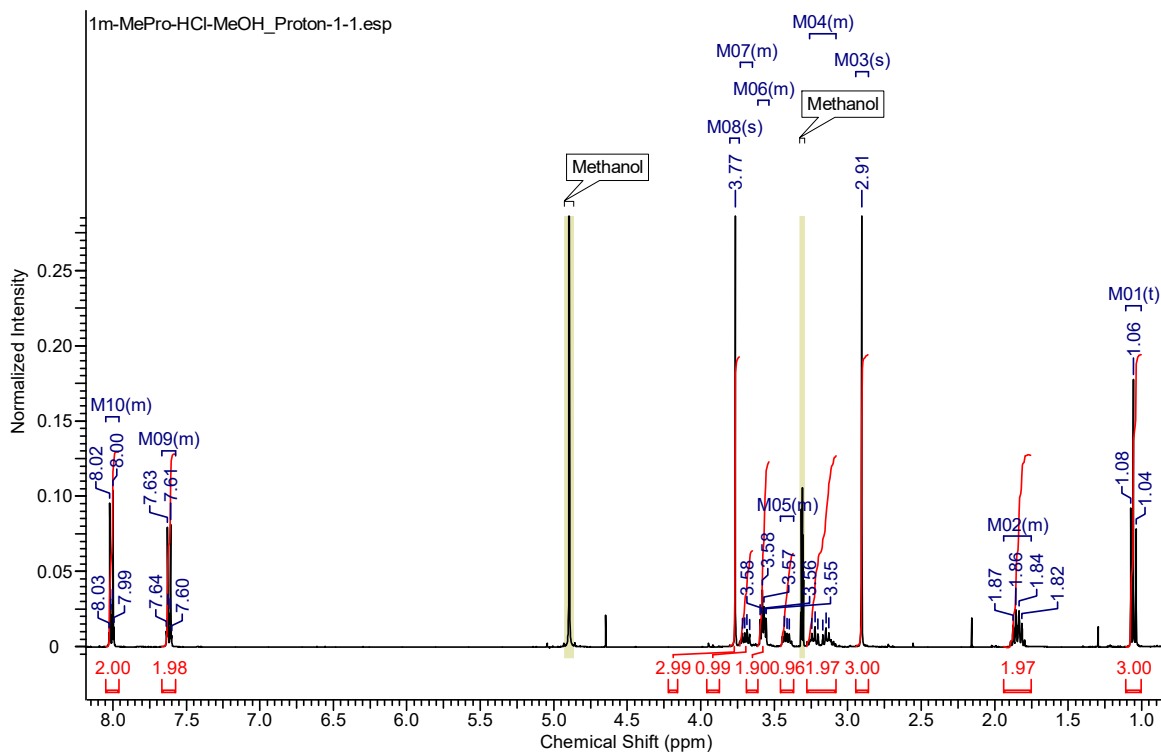

Fig. S 20:  $^1\text{H}$  NMR spectrum of compound 14

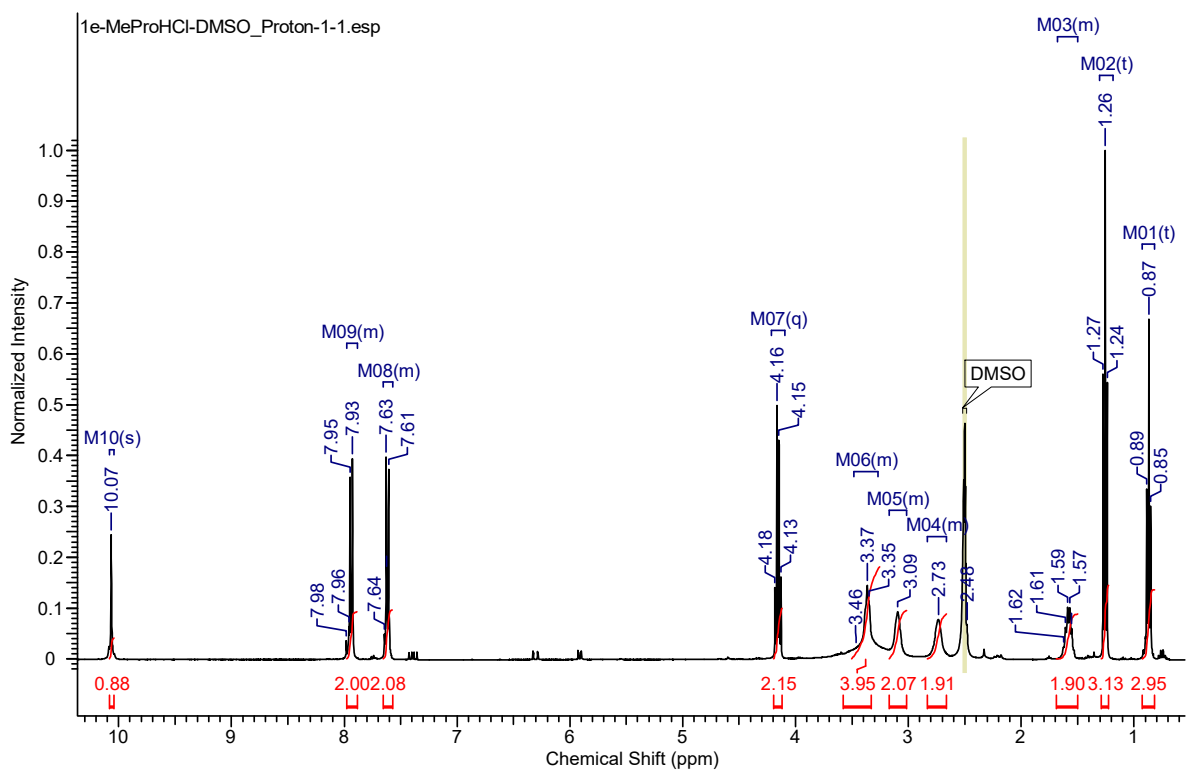

Fig. S 21:  $^1\text{H}$  NMR spectrum of compound 15

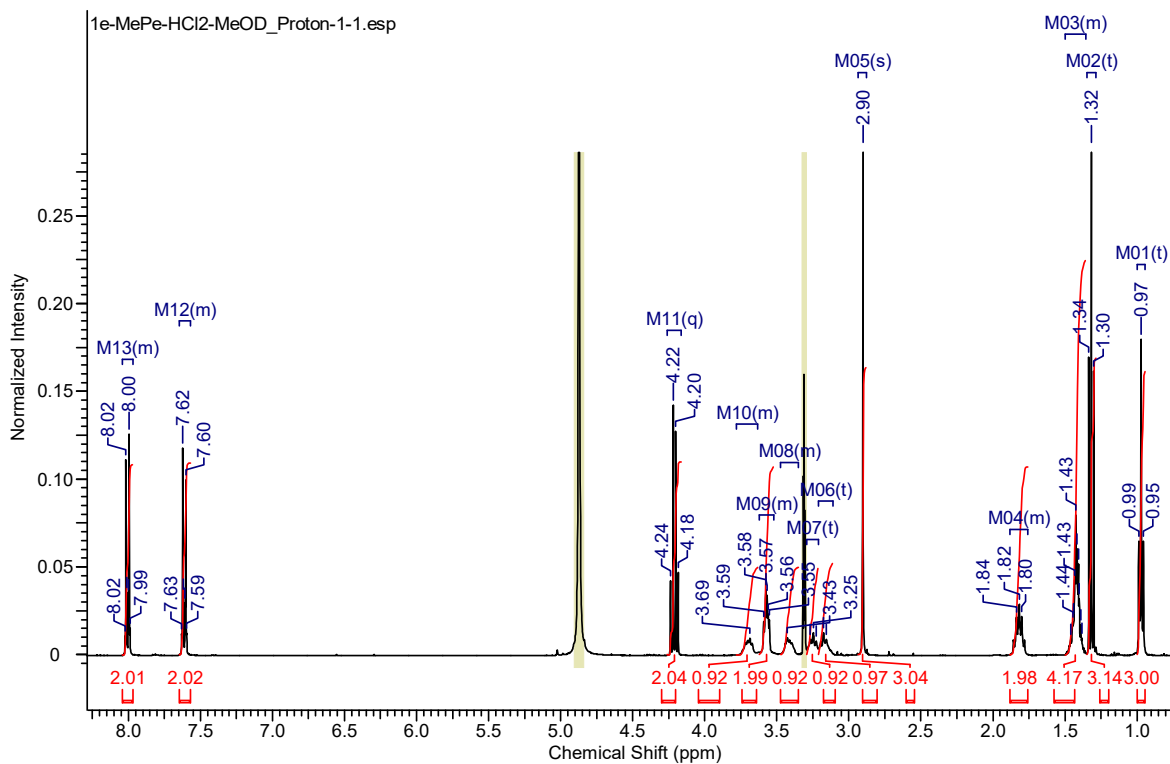

Fig. S 22:  $^1\text{H}$  NMR spectrum of compound 16

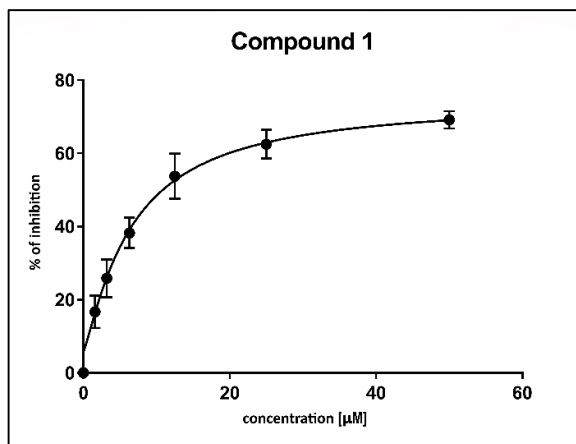

Fig. S 23: Graph of  $\text{IC}_{50}$  determination for compound 1, inhibition of AChE.

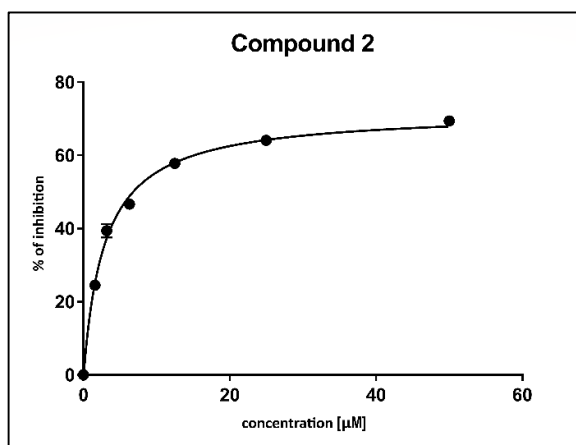

Fig. S 24: Graph of  $\text{IC}_{50}$  determination for compound 2, inhibition of AChE.

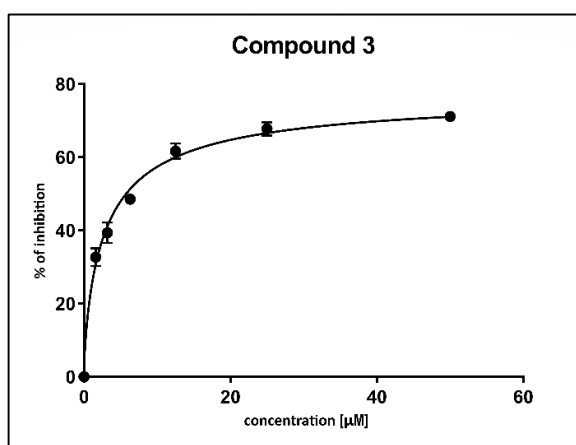

Fig. S 25: Graph of  $\text{IC}_{50}$  determination for compound 3, inhibition of AChE.

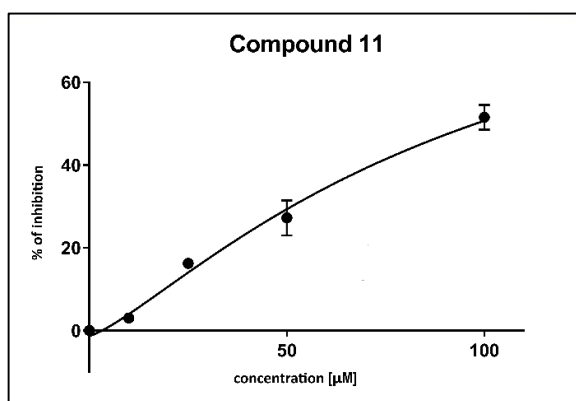

Fig. S 26: Graph of  $\text{IC}_{50}$  determination for compound 11, inhibition of BuChE.

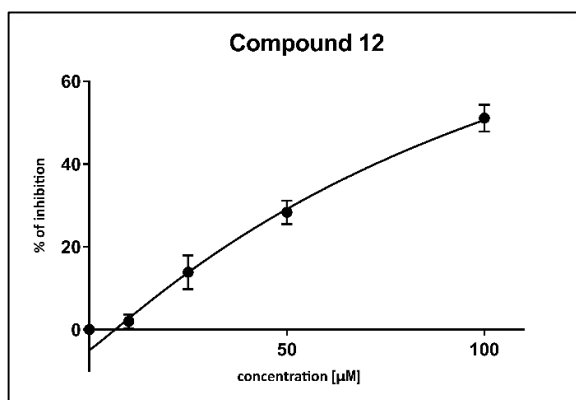

Fig. S 27: Graph of  $IC_{50}$  determination for compound **12**, inhibition of BuChE.

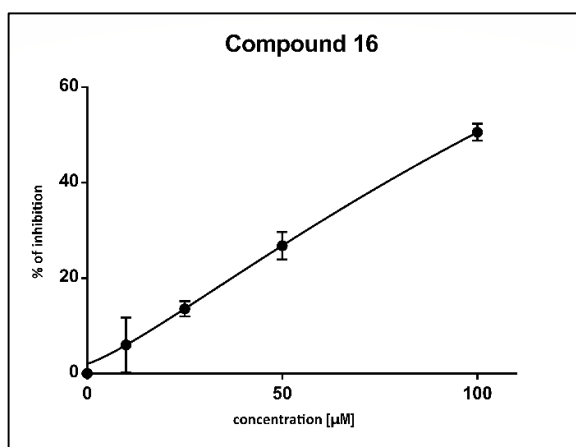

Fig. S 28: Graph of  $IC_{50}$  determination for compound **16**, inhibition of AChE.

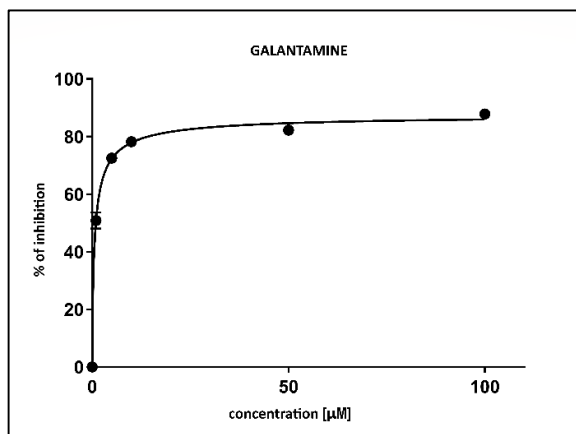

Fig. S 29: Graph of  $IC_{50}$  determination for **galantamine**, inhibition of AChE.

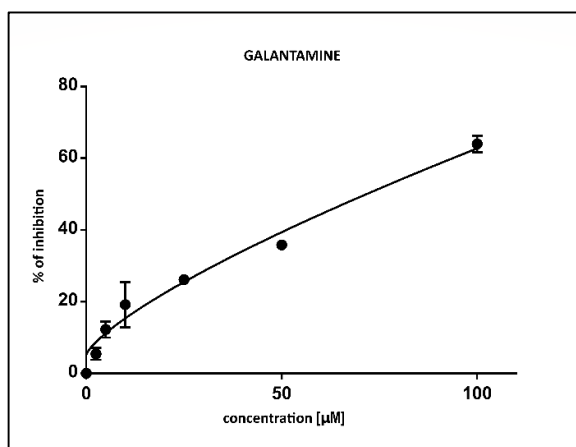

Fig. S 30: Graph of  $IC_{50}$  determination for *galantamine*, inhibition of BuChE.
